# Supplementary material for: Assessing gene expression profiling from FFPE Patient Samples: A Comparison of Two Library Preparation Approaches and Recommendations
Source: Research Square preprint supplement (doi:10.21203/rs.3.rs-6423077/v1), 2025-05-12
Supplement: Supplementary file 1 [file 99bdb5d7fe47478e08af2d40.docx]

Supplementary Table 1. Quality and quantification of RNA extracted from FFPE sections.

| **Samples** | **Qubit (ng/ul)** | **%**  **50-200bp** | **DV200** | **RIN** | **260/280** | **260/230** | **Time from FFPE block storage and sequencing (year)** |
| --- | --- | --- | --- | --- | --- | --- | --- |
| Sample 1 | 25 | 59% | 41% | 2.4 | 1,8 | 1,7 | 2 |
| Sample 2 | 374 | 30% | 70% | 2.2 | 2,0 | 2,0 | 1 |
| Sample 3 | 119 | 37% | 63% | 2.4 | 2,1 | 1,9 | 2 |
| Sample 4 | 137 | 36% | 64% | 2.4 | 2,0 | 2,1 | 1 |
| Sample 5 | 28 | 49% | 51% | 2.4 | 1,6 | 1,3 | 2 |
| Sample 6 | 78 | 63% | 37% | 2.3 | 2,0 | 1,8 | 2 |
