# Supplementary material for: Assessing gene expression profiling from FFPE Patient Samples: A Comparison of Two Library Preparation Approaches and Recommendations
Source: Research Square preprint supplement (doi:10.21203/rs.3.rs-6423077/v1), 2025-05-12
Supplement: Supplementary file 2 [file 9a397c23aab42d96fa5882d5.docx]

Supplementary Table 2: List of housekeeping genes analyzed.

| **Gene symbol** | **Name** | **Location** |
| --- | --- | --- |
| SDHA | succinate dehydrogenase complex flavoprotein subunit A | 5p15.33 |
| GAPDH | glyceraldehyde-3-phosphate dehydrogenase | 12p13.31 |
| TBP | TATA-box binding protein | 6q27 |
| RPL13A | ribosomal protein L13a | 19q13.33 |
| HPRT1 | hypoxanthine phosphoribosyltransferase 1 | Xq26.2-q26.3 |
| B2M | beta-2-microglobulin | 15q21.1 |
| GUSB | glucuronidase beta | 7q11.21 |
| PPIA | peptidylprolyl isomerase A | 7p13 |
| HMBS | hydroxymethylbilane synthase | 11q23.3 |
| RPLP0 | ribosomal protein lateral stalk subunit P0 | 12q24.23 |
| PGK1 | phosphoglycerate kinase 1 | Xq21.1 |
